# Supplementary material for: Exosomes induce neurogenesis of pluripotent P19 cells
Source: PubMed Central journal article supplement (PMC10366297; doi:10.1007/s12015-023-10512-6), 2023-02-22

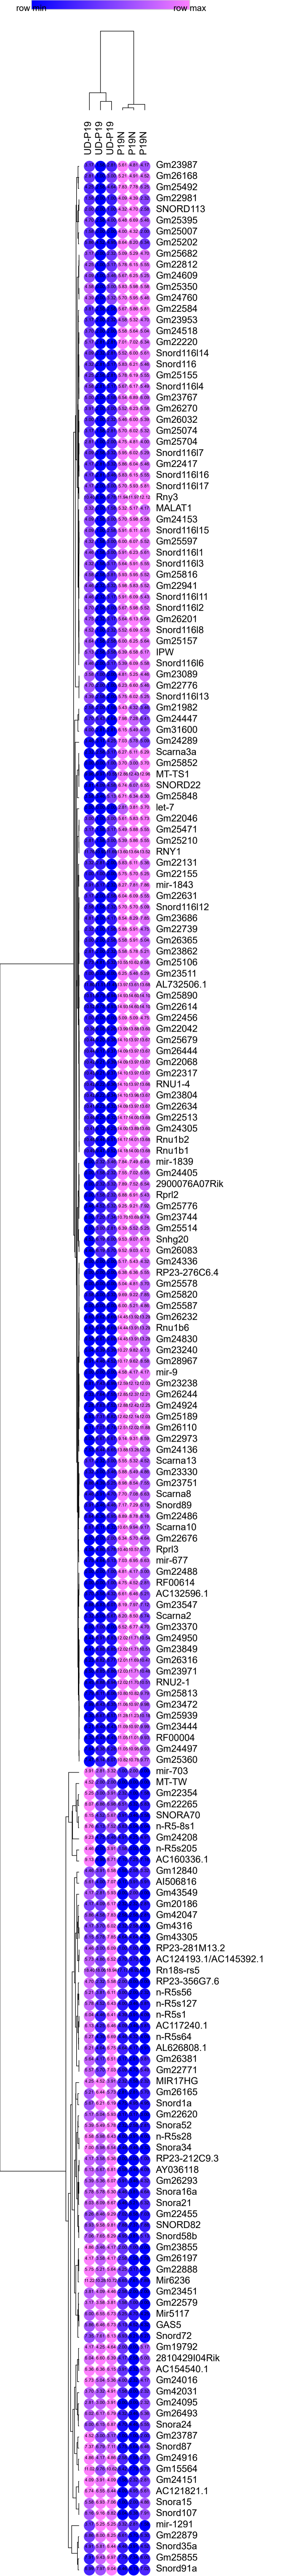

Supplement: 12015_2023_10512_MOESM12_ESM.pdf [file 12015_2023_10512_MOESM12_ESM.pdf]
